# Supplementary material for: Cardiac‐specific succinate dehydrogenase deficiency in Barth syndrome
Source: PubMed Central journal article supplement (PMC4734842; doi:10.15252/emmm.201505644), 2015-12-23
Supplement: EMMM-8-139-s001.pdf [file EMMM-8-139-s001.pdf]

## Expanded View Figures

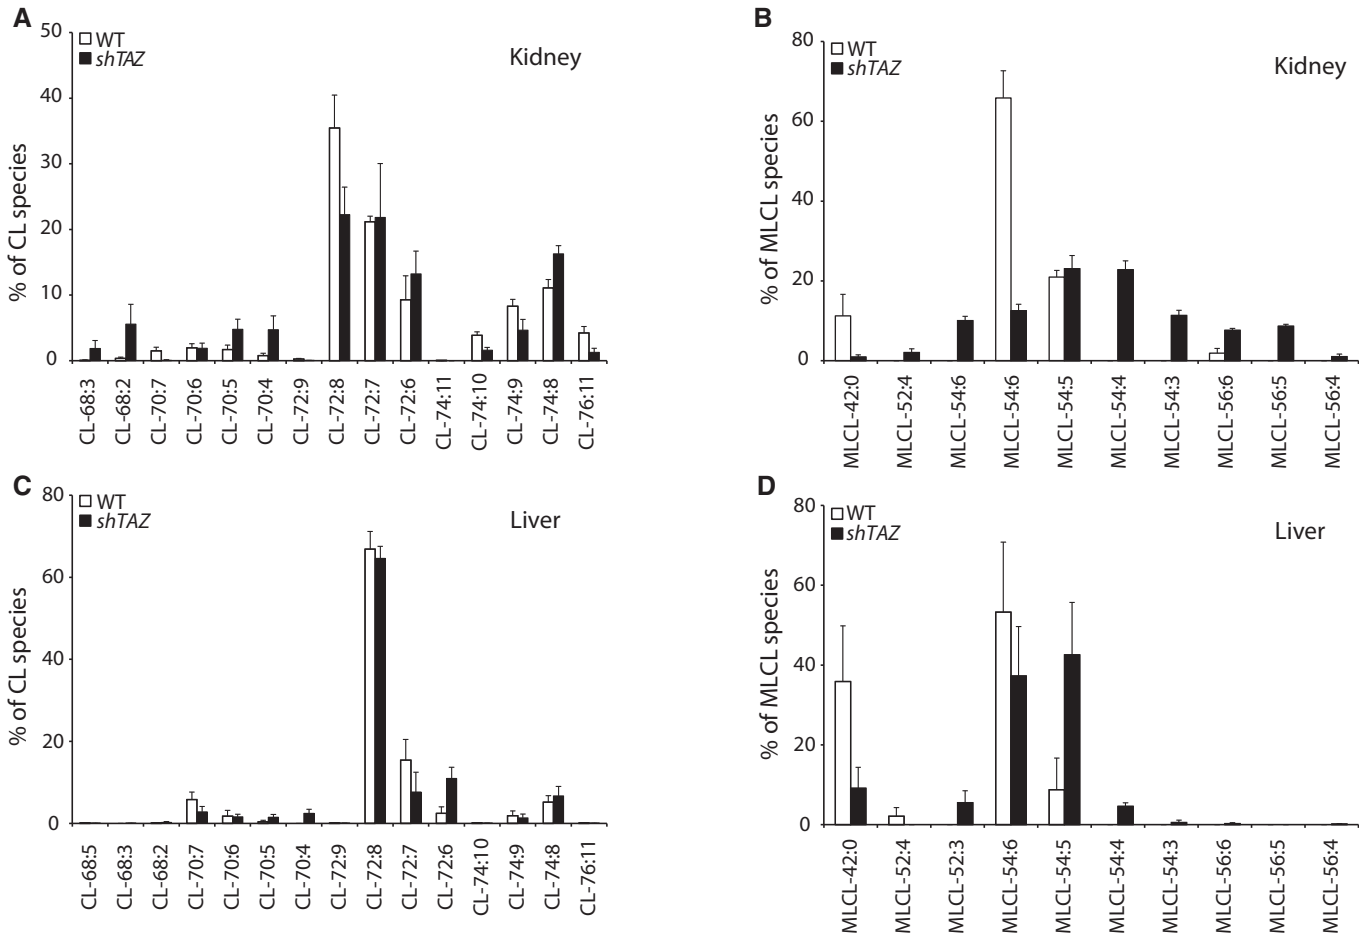**Figure EV1. Cardiolipin and monolysocardiolipin profiles in kidney and liver.**

A–D Lipid species profiles of cardiolipin (A, C) and monolysocardiolipin (B, D) in the mitochondria isolated from indicated tissues analyzed by mass spectrometry. Mean of  $n = 4$  per genotype,  $\pm$  SEM.

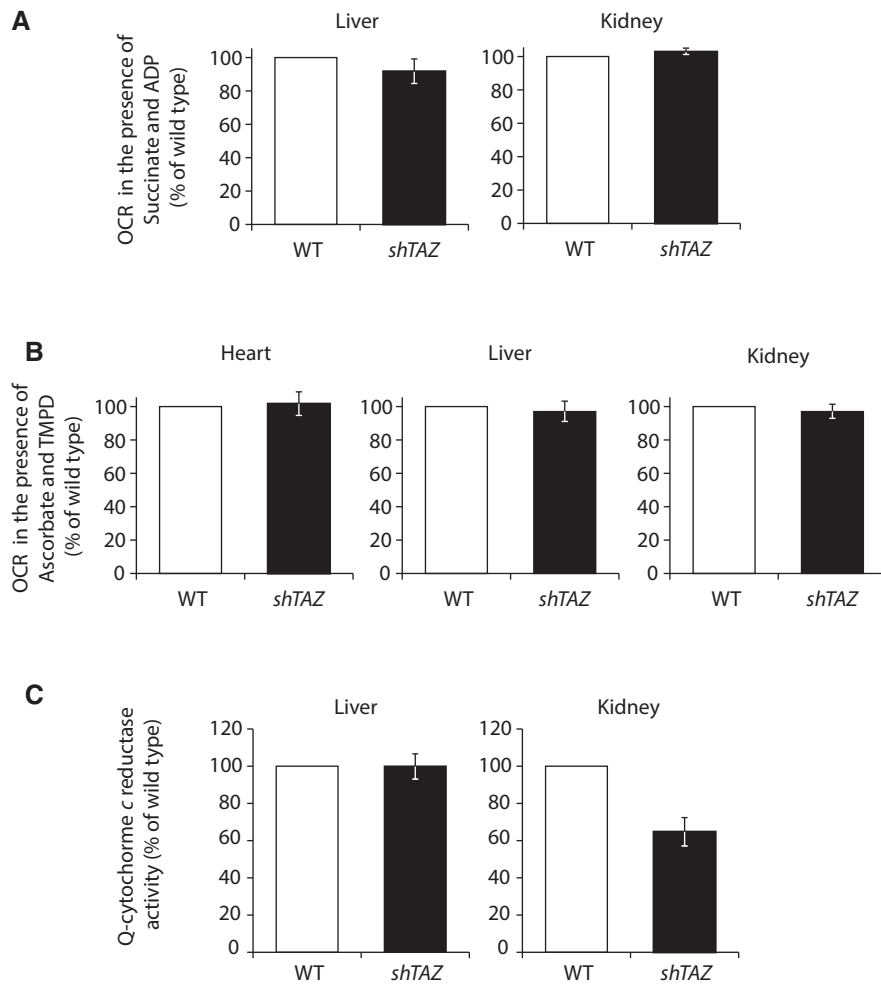

**Figure EV2. Respiration is not affected in kidney and liver.**

**A** Measurement of the oxygen consumption rate (OCR) of isolated mitochondria after the administration of succinate and ADP as substrate. Mitochondria from the liver (left) and kidney (right) were measured from 3 different animals per genotype, mean  $\pm$  SEM.

**B** OCRs of mitochondria after the administration of TMPD and ascorbate, isolated from the heart (left;  $n = 8$  per genotype), liver (central;  $n = 3$  per genotype), and kidney (right;  $n = 3$  per genotype); data represented in mean,  $\pm$  SEM.

**C** Enzymatic activity of complex III in the liver (left;  $n = 3$  per genotype) and kidney (right;  $n = 2$  per genotype) normalized to MDH activity, in percent with control set to 100% (mean  $\pm$  SEM). Complex III activity was measured spectrophotometrically as an increase in reduced cytochrome c over time.
