# Supplementary material for: Cardiac‐specific succinate dehydrogenase deficiency in Barth syndrome
Source: PubMed Central journal article supplement (PMC4734842; doi:10.15252/emmm.201505644), 2015-12-23
Supplement: EMMM-8-139-s006.pdf [file EMMM-8-139-s006.pdf]

## Cardiac specific Succinate Dehydrogenase Deficiency in Barth Syndrome

Jan Dudek, I-Fen Cheng, Arpita Chowdhury, Katharina Wozny, Martina Balleininger, Robert Reinhold, Silke Grunau, Sylvie Callegari, Karl Toischer, Ronald J. A. Wanders, Gerd Hasenfuß, Britta Brügger, Kaomei Guan and Peter Rehling

*Corresponding author: Peter Rehling, Göttingen, University*

---

**Review timeline:**

Submission date:

14 July 2015

Accepted:

27 November 2015

---

*Editor: Roberto Buccione*

No Peer Review Process File is available with this article, as the authors have chosen not to make the review process public in this case.
